# Supplementary material
Source: publisher site journal article supplement (https://www.dovepress.com/article/458467)
Supplement: Supplementary file 1 [file get_supplementary_file.php]

| **Supplemental table 1** Receiver Operating Characteristic Curve Analyses Between Futile Recanalization and CT Perfusion Parameters | | | | | |
| --- | --- | --- | --- | --- | --- |
| **Variable, mL** | **AUC (95% CI)** | ***P* value** | **Cutoff value** | **Sensitivity** | **Specificity** |
| DT > 4 s | 0.670 (0.521-0.819) | 0.033 | 23.5 | 0.792 | 0.633 |
| DT > 6 s | 0.656 (0.506-0.805) | 0.051 | 8.5 | 0.583 | 0.733 |
| DT > 8 s | 0.645 (0.493-0.797) | 0.069 | 2.0 | 0.417 | 0.867 |
| CBF < 40% | 0.719 (0.580-0.858) | 0.006 | 3.5 | 0.792 | 0.567 |
| CBF < 35% | 0.734 (0.598-0.870) | 0.003 | 4.5 | 0.625 | 0.733 |
| CBF < 30% | 0.721 (0.583-0.859) | 0.006 | 4.5 | 0.542 | 0.800 |
| CBF < 25% | 0.685 (0.540-0.830) | 0.021 | 4.5 | 0.458 | 0.867 |
| CBF < 20% | 0.683 (0.539-0.828) | 0.022 | 3.5 | 0.417 | 0.867 |
| CBF < 15% | 0.686 (0.541-0.831) | 0.020 | 0.5 | 0.667 | 0.667 |
| **Abbreviations:** AUC, area under the curve; DT, delay time; CBF, cerebral blood flow. | | | | | |

| **Supplemental table 2** Multicollinearity Analysis for Independent Variables | | | | | | | |
| --- | --- | --- | --- | --- | --- | --- | --- |
| **Coefficientsa** | | | | | | | |
|  | Unstandardized Coefficients | | Standardized  Coefficients |  |  | Collinearity Statistics | |
| Model 1 | B | Standard error | Beta | t | Significance | Tolerance | VIF |
| (constant) | 1.366 | 0.513 |  | 2.661 | 0.011 |  |  |
| NIHSS | 0.010 | 0.010 | 0.145 | 1.090 | 0.281 | 0.792 | 1.263 |
| Pc-ASPECTS | -0.106 | 0.050 | -0.255 | -2.098 | 0.041 | 0.954 | 1.048 |
| BATMAN | -0.070 | 0.037 | -0.269 | -1.895 | 0.064 | 0.698 | 1.432 |
| DT > 4s | -0.002 | 0.003 | -0.154 | -0.725 | 0.472 | 0.310 | 3.229 |
| CBF < 35% | 0.015 | 0.007 | 0.427 | 2.127 | 0.039 | 0.348 | 2.872 |
| HIRb | -0.032 | 0.078 | -0.088 | -0.411 | 0.683 | 0.303 | 3.302 |
| **Note:** a Dependent variable: futile recanalization; b 0.1 increment  Predictive variables in the model: (constant), NIHSS, pc-ASPECTS, BATMAN, DT > 4s, CBF < 35%, and HIR.  **Abbreviations:** VIF, variance inflation factor; NIHSS, National Institutes of Health Stroke Scale; pc-ASPECTS, posterior circulation Acute Stroke Prognosis Early CT Score; BATMAN, Basilar Artery on Computed Tomography Angiography; DT, delay time; CBF, cerebral blood flow; HIR, hypoperfusion intensity ratio. | | | | | | | |
